# Supplementary material for: Acupuncture Improves Sleep Disorders and Depression among Patients with Parkinson’s Disease: A Meta-Analysis
Source: MDPI journal article supplement (doi:10.3390/healthcare11142042), 2023-07-17
Supplement: s1 [file s1]

# Supplementary Material: Acupuncture Improves Sleep Disorders and Depression among Patients with Parkinson's Disease: A Meta-Analysis

Wei-Ti Hsu, Chieh-Min Hsu, Shao-Chi Hung and Shih-Ya Hung

**Table S1.** Literature search strings for our meta-analysis in various databases.

| Database       | Strings                                                                                                                                                                                                                        |
|----------------|--------------------------------------------------------------------------------------------------------------------------------------------------------------------------------------------------------------------------------|
| Pubmed         | ((Parkinson disease) OR Parkinsonism) AND (acupuncture OR electroacupuncture)                                                                                                                                                  |
| Embase         | ('parkinson disease'/exp OR 'parkinson disease' OR (parkinson AND ('disease'/exp OR disease))) OR 'parkinsonism'/exp OR parkinsonism) AND ('acupuncture'/exp OR acupuncture OR 'electroacupuncture'/exp OR electroacupuncture) |
| Web of Science | ((Parkinson disease) OR Parkinsonism) AND (acupuncture OR electroacupuncture)                                                                                                                                                  |
| CINAHL         | ((Parkinson disease) OR Parkinsonism) AND (acupuncture OR electroacupuncture)                                                                                                                                                  |

**Table S2.** Grading of Recommendations Assessment, Development, and Evaluation (GRADE) evidence profile for the included studies.

| Certainty assessment |               |              |              |               |              |             |       |                        |         |                                |                     |
|----------------------|---------------|--------------|--------------|---------------|--------------|-------------|-------|------------------------|---------|--------------------------------|---------------------|
| Outcome              | No. of trials | Study design | Risk of bias | Inconsistency | Indirectness | Imprecision | Other | Number of patients (n) |         | Effect estimate (95% CI)       | Quality of evidence |
|                      |               |              |              |               |              |             |       | Acupuncture            | Control |                                |                     |
| Sleep disorders      | 8             | RCTs         | Serious*     | Serious**     | Not serious  | Not serious | None  | 190                    | 178     | SMD 0.549<br>(0.181 to 0.916)  | ⊕⊕○○<br>Low         |
| Depression           | 9             | RCTs         | Serious*     | Not serious   | Not serious  | Not serious | None  | 234                    | 223     | SMD 0.242<br>(0.055 to 0.430)  | ⊕⊕⊕○<br>Moderate    |
| Anxiety              | 4             | RCTs         | Serious*     | Not serious   | Not serious  | Serious***  | None  | 125                    | 116     | SMD 0.095<br>(-0.159 to 0.348) | ⊕○○○<br>Very low    |
| Fatigue              | 2             | RCTs         | Not serious  | Not serious   | Not serious  | Serious***  | None  | 64                     | 61      | SMD 0.273<br>(-0.080 to 0.626) | ⊕⊕○○<br>Low         |

GRADE: Grading of Recommendations, Assessment, Development, and Evaluations  
 RCT: Randomized controlled trials; CI: Confidence interval; SMD: Standard Mean difference.  
 \*The modified Jadad score of included articles indicated moderate quality.  
 \*\*Substantial heterogeneity (I square > 50%).  
 \*\*\*95% Confidence interval includes both acupuncture and Control (p > 0.05).

**Table S3.** Adverse events associated with acupuncture and electroacupuncture in each study.

| Study                      | Adverse events                                                                                                                  |
|----------------------------|---------------------------------------------------------------------------------------------------------------------------------|
| Cho et al., 2012 [8]       | One subject in the bee venom acupuncture group complained of itchiness.                                                         |
| Xia et al., 2012 [28]      | Not available                                                                                                                   |
| Chen et al., 2015 [29]     | There were no side effects or serious adverse events.                                                                           |
| Wang et al., 2015 [30]     | Not available                                                                                                                   |
| Kluger et al., 2016 [20]   | Increased constipation in one participant receiving real acupuncture                                                            |
| Aroxa et al., 2017 [31]    | Not available                                                                                                                   |
| Cho et al., 2018 [32]      | No serious adverse events were noted during the study period. Only mild itchiness or mild swelling after bee venom acupuncture. |
| Kong et al., 2018 [23]     | A total of three adverse events were reported. But, all adverse events were deemed not related to acupuncture treatment.        |
| Yu et al., 2019 [33]       | Not available                                                                                                                   |
| Xu et al., 2020 [34]       | No acupuncture-related adverse events were observed in either group.                                                            |
| Fan et al., 20229 [22]     | Four mild adverse reactions occurred during the study. However, no serious adverse events occurred.                             |
| Li et al., 2022 [19]       | Not available                                                                                                                   |
| Nazarova et al., 2022 [35] | One patient from the electroacupuncture group reported two recent falls during the treatment period.                            |

**Table S4.** A detailed summary of the acupoints and treatment protocol in each study.

| Study                      | Acupuncture or electroacupuncture | Acupoints                                                                                                                                                                  | Treatment Protocol                                                                          |
|----------------------------|-----------------------------------|----------------------------------------------------------------------------------------------------------------------------------------------------------------------------|---------------------------------------------------------------------------------------------|
| Cho et al., 2012 [8]       | Acupuncture                       | GB20 (Fengchi), LI11 (Quchi), GB34 (Yanglingquan), ST36 (Zusanli), LR3 (Taichong)<br>*Bilateral                                                                            | 20 mins; twice per week for 8 weeks                                                         |
| Xia et al., 2012 [28]      | Electroacupuncture                | GV20 (Baihui), EX-HN3 (Yintang), EX-HN1 (Sishencong), LR3 (Taichong), SP6 (Sanyinjiao)                                                                                     | 30 mins; once every 2 days for 3 months                                                     |
| Chen et al., 2015 [29]     | Acupuncture                       | GV20 (DU20, Baihui), GB20 (Fengchi), LI11 (Quchi), LI10 (Shousanli), LI4 (Hegu), GB31 (Fengshi), ST32 (Futu), GB34 (Yanglingquan), GB38 (Yangfu)<br>*Bilateral except DU20 | >15 mins; twice per week for 18 weeks                                                       |
| Wang et al., 2015 [30]     | Electroacupuncture                | GB20 (Fengchi), LI4 (Hegu), Du14 (Dazhui), Du16 (Fengfu)<br>*Bilateral                                                                                                     | Electrical pulses of 9 V, 1 A, 9 W, and 100 Hz for 30 mins; once every 3 days for 2 months  |
| Kluger et al., 2016 [20]   | Acupuncture                       | GV20 (Baihui), GV24 (Shenting), LI10 (Shousanli), HT7 (Shenmen), ST36 (Zusanli), SP6 (Sanyinjiao)                                                                          | 30 mins; twice per week for 6 weeks                                                         |
| Aroxa et al., 2017 [31]    | Acupuncture                       | LR3 (Taichong), SP6 (Sanyinjiao), LI4 (Hegu), TE5 (Waiguan), HT7 (Shenmen), PC6 (Neiguan), LI11 (Quchi), GB20 (Fengchi).                                                   | 30 mins; once per week for 8 weeks                                                          |
| Cho et al., 2018 [32]      | Acupuncture                       | GB20 (Fengchi), LI11 (Quchi), GB34 (Yanglingquan), ST36 (Zusanli), LR3 (Taichong)<br>*Bilateral                                                                            | 15 mins; twice per week for 12 weeks                                                        |
| Kong et al., 2018 [23]     | Acupuncture                       | PC6 (Neiguan), LI4 (Hegu), ST36 (Zusanli), SP6 (Sanyinjiao), KI3 (Taixi), CV6 (Qihai).                                                                                     | 20 mins; twice per week for 5 weeks                                                         |
| Yu et al., 2019 [33]       | Acupuncture                       | GV20 (Baihui), Shen Guan (77.18), GB34 (Yanglingquan)                                                                                                                      | 30 mins; one to three times per week for 8 weeks                                            |
| Xu et al., 2020 [34]       | Electroacupuncture                | GV17 (Naohu), GB19 (Naokong), EX-HN 1 (Sishencong) and temporal three-needle, GV20 (Baihui)                                                                                | Continuous waves at alternating low 100 Hz frequency; 30 mins; 4 times per week for 8 weeks |
| Fan et al., 20229 [22]     | Acupuncture                       | GV24 (Shenting), GV29 (Yintang), HT7 (Shenmen), SP6 (Sanyinjiao), EX-HN 1 (Sishencong)                                                                                     | 30 mins; 3 times per week for 8 weeks                                                       |
| Li et al., 2022 [19]       | Acupuncture                       | GV24 (Shenting), GV20 (Baihui), KI6 (Zhaohai), Guanyuan (CV4)                                                                                                              | 30 mins; once per day for 30 days                                                           |
| Nazarova et al., 2022 [35] | Electroacupuncture                | GV20 (Baihui), GB20 (Fengchi), CV4 (Guanyuan), CV12 (Zhongwan), ST25 (Tianshu), ST36 (Zusanli), SP-6 (Sanyinjiao), LI4 (Hegu), ST40 (Fenglong), LR3 (Taichong)             | Continuous wave at 50/100 Hz; 30 mins; twice per week for 8 weeks                           |

# RoB-2 evaluation of included studies

|       |                       | Risk of bias domains |    |    |    |    |         |
|-------|-----------------------|----------------------|----|----|----|----|---------|
|       |                       | D1                   | D2 | D3 | D4 | D5 | Overall |
| Study | Cho et al., 2012      | ⊖                    | ⊖  | ⊖  | ⊕  | ⊖  | ⊖       |
|       | Xia et al., 2012      | ⊖                    | ⊖  | ⊕  | ⊕  | ⊖  | ⊖       |
|       | Chen et al., 2015     | ⊗                    | ⊖  | ⊕  | ⊕  | ⊖  | ⊗       |
|       | Wang et al., 2015     | ⊖                    | ⊖  | ⊕  | ⊕  | ⊖  | ⊖       |
|       | Kluger et al., 2016   | ⊕                    | ⊕  | ⊕  | ⊕  | ⊕  | ⊕       |
|       | Aroxa et al., 2017    | ⊕                    | ⊖  | ⊕  | ⊕  | ⊕  | ⊖       |
|       | Cho et al., 2018      | ⊕                    | ⊕  | ⊕  | ⊕  | ⊖  | ⊖       |
|       | Kong et al., 2018     | ⊕                    | ⊕  | ⊕  | ⊕  | ⊕  | ⊕       |
|       | Yu et al., 2019       | ⊗                    | ⊖  | ⊕  | ⊕  | ⊖  | ⊗       |
|       | Xu et al., 2020       | ⊕                    | ⊖  | ⊕  | ⊕  | ⊕  | ⊖       |
|       | Fan et al., 2022      | ⊕                    | ⊕  | ⊕  | ⊕  | ⊕  | ⊕       |
|       | Li et al., 2022       | ⊕                    | ⊕  | ⊖  | ⊕  | ⊕  | ⊖       |
|       | Nazarova et al., 2022 | ⊖                    | ⊖  | ⊖  | ⊕  | ⊖  | ⊖       |

Domains:

D1: Bias arising from the randomization process

D2: Bias due to deviations from the intended interventions

D3: Bias due to missing outcome data

D4: Bias in measurement of the outcome

D5: Bias in selection of the reported result

Judgement

⊕ Low

⊖ Some concerns

⊗ High

Cochrane risk-of-bias tool for randomized trials version 2 (RoB 2).

In this color-coded ranking, green color represents low risk of bias, yellow some concerns, and red high risk of bias

**Figure S1.** RoB-2 evaluation of included studies.
